# Supplementary material for: Quantitation of Gene Expression in Formaldehyde-Fixed and Fluorescence-Activated Sorted Cells
Source: PubMed Central journal article supplement (PMC3759445; doi:10.1371/journal.pone.0073849), 2013-09-02
Supplement: pone.0073849.s003.pdf [file pone.0073849.s003.pdf]

**Table S1. Amplicon lengths for RT-qPCR reactions.**

| <b>Gene</b>  | <b>Amplicon size (bp)</b> |
|--------------|---------------------------|
| 18S          | 104                       |
| GAPDH        | 111                       |
| TNF $\alpha$ | 75                        |
| MxA          | 78                        |
