# Supplementary material for: Quantitation of Gene Expression in Formaldehyde-Fixed and Fluorescence-Activated Sorted Cells
Source: PubMed Central journal article supplement (PMC3759445; doi:10.1371/journal.pone.0073849), 2013-09-02
Supplement: pone.0073849.s004.pdf [file pone.0073849.s004.pdf]

**Table S2. Primer and probe sequences for qPCR reactions.**

| <b>Gene</b>  | <b>Forward Primer</b>         | <b>Reverse Primer</b>                  | <b>Probe</b>                            |
|--------------|-------------------------------|----------------------------------------|-----------------------------------------|
| 18S          | TAG AGG GAC AAG TGG CGT TC    | CGC TGA GCC AGT CAG TGT                | AGC AAT AAC AGG TCT GTG ATG             |
| GAPDH        | AGC CTC AAG ATC ATC AGC AAT G | ATG GAC TGT GGT CAT GAG TCC TT         | CCA ACT GCT TAG CAC CCC TGG CC          |
| TNF $\alpha$ | GGC TCA GGC AGT CAG ATC ATC   | GCT TGA GGG TTT GCT ACA ACA TG         | TCG AAC CCC AAG TGA CAA GCC TGT AGC     |
| MxA          | AGG AGT TGC CCT TCC CAG A     | TCG TTC ACA AGT TTC TTC AGT TTC A      | ACC AGC GGG CAT CTG GTC ACG A           |
| SIV          | GTC TGC GTC ATC TGG TGC ATT C | CAC TAG GTG TCT CTG CAC TAT CTG TTT TG | CTT CCT CAG TGT GTT TCA CTT TCT CTT CTG |
| IFN $\beta$  | GCC TCA AGG ACA GGA TGA ACT T | GCG TCC TCC TTC TGG AAC TG             | CAT CCC TGA GGA AAT TAA GCA GCC GC      |
