# Supplementary material for: Quantitation of Gene Expression in Formaldehyde-Fixed and Fluorescence-Activated Sorted Cells
Source: PubMed Central journal article supplement (PMC3759445; doi:10.1371/journal.pone.0073849), 2013-09-02
Supplement: pone.0073849.s005.pdf [file pone.0073849.s005.pdf]

Table S3. nCounter® Human Reference GX kit probe set.

| Gene   | Accession Number | Sequence                                                                                              |
|--------|------------------|-------------------------------------------------------------------------------------------------------|
| ABCF1  | NM_001090.2      | GATGTCCTCCCGCAAGCCATGTTAGAAAAATGCATCTGACATCAAGCTGGAGAAGTTCAGCATCTCCGCTCATGGCAAGGAGCTGTTTCGTCAATGCAGAC |
| ACTB   | NM_001101.2      | TGCAGAAGGAGATCACTGCCCTGGCACCCAGCACAAATGAAGATCAAGATCATTGCTCCTCCTGAGCGCAAGTACTCCGTGTGGATCGGCGGCTCCATCCT |
| ALAS1  | NM_000688.4      | GGGGATCGGGATGGAGTCATGCCAAAATGGACATCATTCTGGAACTTGGCAAAGCCTTTGGTTGTGTTGGAGGGTACATGCCAGCAGCAGTTCTC       |
| B2M    | NM_004048.2      | CGGGCATTCTGAAGCTGACAGCATTGCGGCCGAGATGTCTCGCTCCGTGGCCTTAGCTGTGCTCGCGCTACTCTCTCTTTCTGGCCTGGAGGCTATCCA   |
| CLTC   | NM_004859.2      | GGGTATCAACCCAGCAAAACATTGGCTTCAGTACCCTGACTATGGAGTCTGACAAATTCATCTGCATTAGAGAAAAAGTAGGAGAGCAGGCCAGGTGGTA  |
| G6PD   | NM_000402.2      | ACAACATCGCCTGCGTTATCCTCACCTTCAAGGAGCCCTTTGGCACTGAGGGTCCGCGGGGGCTATTTGCATGAATTTGGGATCATCCGGACGTGATGCA  |
| GAPDH  | NM_002046.3      | TCCTCCTGTTTCGACAGTCAGCCGCATCTCTTTTGCCTGCCAGCCGAGCCACATCGCTCAGACACCATGGGAAGGTGAAGGTCGGAGTCAACCGATTT    |
| GUSB   | NM_000181.1      | CGGTCGTGATGTGGTCTGTGGCCAAAGAGCCTGCGTCCACCTAGAATCTGCTGGCTACTACTTGAAGATGGTATCGCTCACACCAATCCTTGGACCC     |
| HPRT1  | NM_000194.1      | TGTGATGAAGGAGATGGGAGGCCATCACATTGTAGCCCTCTGTGTCTCAAGGGGGCTATAAATCTTTGCTGACCTGCTGGATTACATCAAAGCACTG     |
| LDHA   | NM_005566.1      | CAGAATGGAATCTCAGACCTTGTGAAGGTGACTCTGACTTCTGAGGAAGAGGCCCGTTTGAAGAAGAGTGCAGATACACTTTGGGGGATCCAAAAGGAGC  |
| PGK1   | NM_000291.2      | GCAAGAAGTATGCTGAGGCTGTCACTCGGGCTAAGCAGATTGTGTGAATGGTCCGTGGGGGTATTTGAATGGGAAGCTTTTGCCTGGGAACCAAAGC     |
| POLR1B | NM_019014.3      | GGAGAACTCGGCCTTAGAATACTTTGGTGAATGTTAAAGGCTGCTGGCTACAATTTCTATGGCACCAGAGGTTATATAGTGGCATCAGTGGGCTAGAA    |
| POLR2A | NM_000937.2      | TTCAAAGAAGCCAAAGACTCCTTCGCTTACTGTCTTCTGTTGGGCCAGTCCGCTCGAGATGCTGAGAGAGCCAAGGATATTCTGTGCCGTCTGGAGCAT   |
| RPL19  | NM_000981.3      | CCAATGCCGAATGCCAGAGAAGGTCACATGGATGAGGAGAATGAGGATTTTGGCCGGCTGCTCAGAAGATACCCTGAATCTAAGAAGATCGATCGCCA    |
| RDLP0  | NM_001002.3      | CGAAATGTTTCATTGTGGGAGCAGACAATGTGGCTCCAAGCAGATGCAGCAGATCCGCATGTCCTTTCGCGGGAAGGCTGTGGTGTGATGGGCAAGAA    |
| SDHA   | NM_004168.1      | TGGAGGGGAGGCTTGGCAGCTGCATTTGGCCTTCTGAGGCAGGGTTAATACAGCATGTGTTACCAAGCTGTTTCCACCAGGTACACACTGTTGCA       |
| TBP    | NM_003194.3      | CGCCGGCTGTTTAACTTCGCTTCCGCTGGCCCATAGTGATCTTTCAGTGACCCAGCAGCATCACTGTTTCTTGGCGTGTGAAGATAACCCAAAGGAATTG  |
| TUBB   | NM_178014.2      | TGGTGGATCTAGAACCTGGGACCATGGACTCTGTTGCTCAGTCTTTTGGCCAGATCTTAGACCAGACAACCTTTGATTTGGTCAGTCTGGGCGAGG      |
